# Supplementary material for: Interactions of the Bacillus subtilis DnaE polymerase with replisomal proteins modulate its activity and fidelity
Source: PubMed Central journal article supplement (PMC5627055; doi:10.1098/rsob.170146), 2017-09-06
Supplement: rsob170146supp1.pdf [file rsob170146supp1.pdf]

1 **Interactions of the *Bacillus subtilis* DnaE polymerase with replisomal proteins modulate its**  
2 **activity and fidelity**

3

4 Vasileios Paschalis<sup>1,#</sup>, Emmanuelle Le Chatelier<sup>2,§,#</sup>, Matthew Green<sup>1,#</sup>, François Képès<sup>3,¶</sup>,  
5 Panos Soultanas<sup>1,\*</sup> and Laurent Janniere<sup>3,¶,\*</sup>

6

7 <sup>1</sup>Centre for Biomolecular Sciences,

8 School of Chemistry,

9 University Park,

10 University of Nottingham,

11 Nottingham NG7 2RD, UK

12

13 <sup>2</sup>Institut National de la Recherche Agronomique

14 Génétique Microbienne,

15 F-78350 Jouy-en-Josas, France

16

17 <sup>3</sup>iSSB, Genopole, CNRS, Univ EVRY, Université Paris-Saclay,

18 Génopole Campus 1, Genavenir 6,

19 5 rue Henri Desbruères

20 F-91030 Evry, France

21

22 <sup>§</sup>Present address: Institut National de la Recherche Agronomique,

23 Metagenopolis (US1367)

24 F-78350 Jouy-en-Josas France

25

26 <sup>¶</sup>Present address: CEA, CNRS, Univ EVRY, Université Paris-Saclay,

27 Génomique Métabolique (UMR8030),

28 Laboratoire iSSB,

29 Génopole Campus 1, Genavenir 6,

30 5 rue Henri Desbruères

31 F-91030 Evry, France

32

33 # These authors contributed equally to this work

34 \*Joint corresponding authors

35 L. Janniere: laurent.janniere@issb.genopole.fr

36 P. Soultanas: Panos.Soultanas@nottingham.ac.uk

37 DOI: 10.1098/rsob.20160146

38

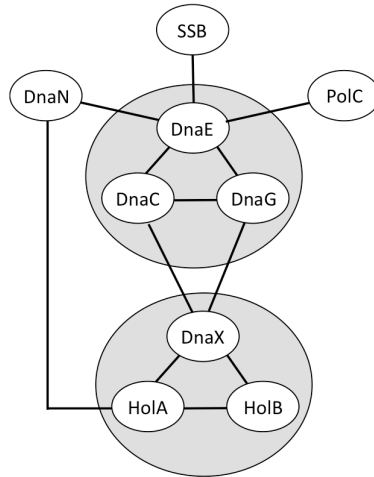

39

40

41 **Supplemental Figure S1**

42 Relevant protein-protein interactions in the replisome.

43 Small and large grey circles represent proteins and protein complexes, respectively. DnaC:  
 44 helicase; DnaG: primase; DnaE: DNA polymerase; PolC: DNA polymerase; DnaX, HoIA and  
 45 HoIB: subunits of the clamp loader; DnaN: clamp; SSB: single stranded binding protein. The  
 46 DnaE-DnaC-DnaG complex is at the heart of the lagging strand half of the replisome (see  
 47 the text for more details).

48

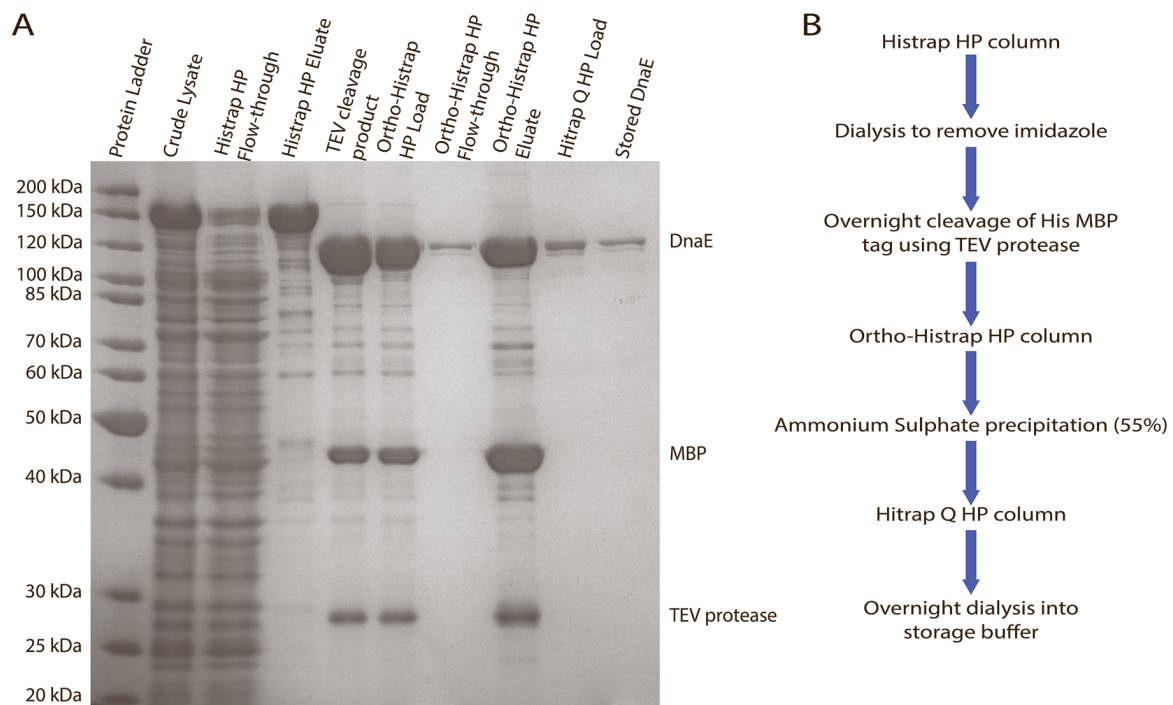

49

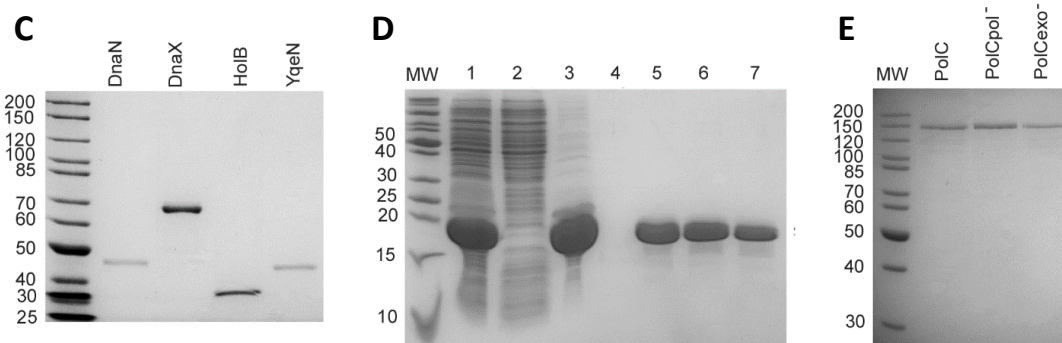

50

51 **Supplemental Figure S2**

52 SDS-PAGE gels showing the purified proteins

53 N-terminal hexahistidine-tag maltose binding protein cleaved DnaE purification steps (A) and

54 scheme (B). C: SDS-PAGE gels showing the purified DnaN, DnaX, HoIB and YqeN proteins.

55 D. SDS PAGE monitoring the purification of SSB. Numbered lanes show the crude lysate

56 (lane 1), ammonium sulphate supernatant (lane 2), the protein after the ammonium sulphate

57 cut as was loaded onto hiTrap Q HP (lane 3), the flowthrough from the HisTrap Q HP (lane

58 4), the protein eluted from HisTrap Q HP (lane 5) and two fractions after the final gel filtration

59 through a HiLoad 26/60 Superdex (lanes 6, 7). (E) SDS-PAGE gels showing the purified

60 PolC, PolC<sub>pol</sub>- and PolC<sub>exo</sub>-.

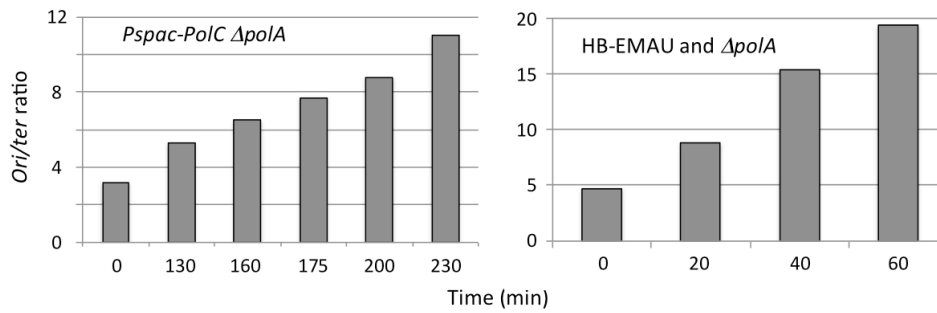

61

62

63 **Supplemental Figure S3**

64 The over-replication of the *oriC* region in cells depleted in PolC activity is independent on Pol  
65 I.

66 Left panel: The DGRM818 strain encoding PolC from the IPTG inducible promoter *Pspac*  
67 and deleted for *polA*, was grown in the presence of 1mM IPTG and then diluted in the  
68 absence of the inducer. The *ori/ter* ratio was determined by qPCR at different time points  
69 upon inducer removal. Right panels: Exponentially growing EDV97 cells lacking *polA* were  
70 treated with a lethal concentration of a HB-EMAU (10  $\mu$ M). The *ori/ter* ratio was determined  
71 by qPCR at different time points upon HB-EMAU treatment. Representative experiments are  
72 shown.

73

74

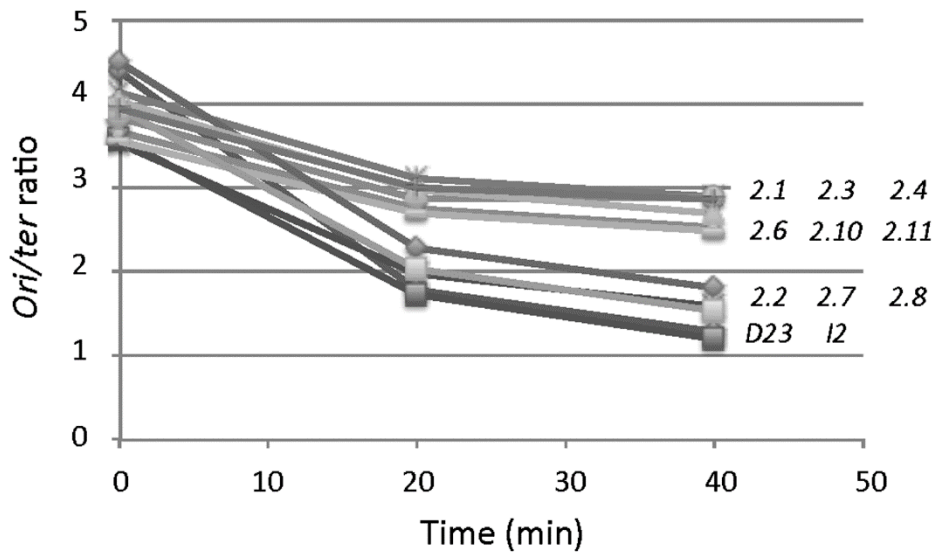

75

#### 76 **Supplemental Figure S4**

77 Replication arrest in thermosensitive DnaE mutants.

78 Exponentially growing cultures of *dnaE*, *dnaD* and *dnaI* thermosensitive mutants were  
79 shifted from permissive (30°C) to restrictive (49°C) temperature and the *ori/ter* ratio was  
80 measured by qPCR before (0 min) and after (20 and 40 min) the temperature shift up.  
81 Representative experiments are shown. *D23*: *dnaD23* (L1434); *I2*: *dnaI2* (L1439); 2.1:  
82 *dnaE2.1* (DGRM630); 2.2: *dnaE2.2* (DGRM1); 2.3: *dnaE2.3* (DGRM631); 2.4: *dnaE2.4*  
83 (DGRM2); 2.5: *dnaE2.5* (DGRM632); 2.6: *dnaE2.6* (DGRM3); 2.7: *dnaE2.7* (DGRM633);  
84 2.8: *dnaE2.8* (DGRM634); 2.10: *dnaE2.10* (DGRM4); 2.11: *dnaE2.11* (DGRM635).

85

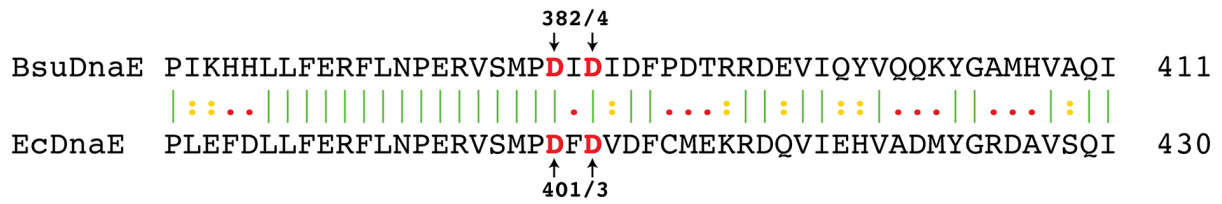

86

87 **Supplemental Figure S5**

88 Alignment of *E. coli* and *B. subtilis* DnaE.

89 The essential aspartic acid residues for the polymerase activity are located at the positions  
 90 382 and 384 for *B. subtilis* DnaE. The alignment was created using EMBOSS Water from  
 91 EMBL-EBI. The full-length protein has 37.8% identity, 56.8% similarity, 6.7% gaps with an  
 92 alignment score of 1922.5. The region in question showed good alignment.

93

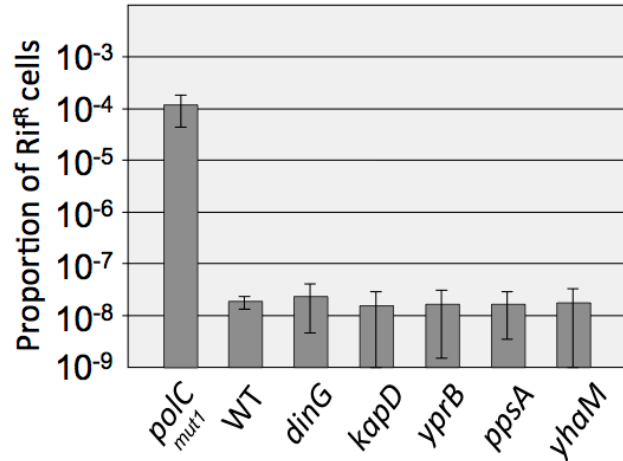

94

95 **Supplemental Figure S6**

96 Search for the DnaE proofreader

97 Strains encoding a WT or a mutated form of the PolC 3'>5' exonuclease proofreader

98 (*PolC<sub>mut1</sub>*) or lacking enzymes containing a domain homologous (DinG and KapD)

99 (DGRM803-804) or distantly related (YprB and PpsA) (DGRM806, DGRM808) to

100 proofreaders or lacking a gene endowed with a 3'>5' exonuclease activity (YhaM)

101 (DGRM810) were tested for spontaneous mutagenesis using the Rif<sup>R</sup> assay. Bars represent

102 mean values and standard errors from at least six independent cultures.

103

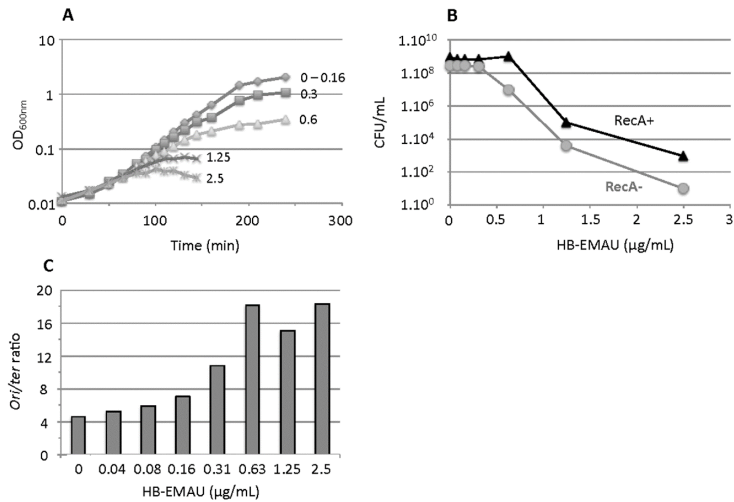

104

105 **Supplemental Figure S7**

106 Effect of HB-EMAU-induced depletion of PolC activity on growth and replication.

107 **A.** Optical analysis of the *B. subtilis* 168 strain growth in LB broth supplemented with  
 108 different concentrations of HB-EMAU (µg/mL).

109 **B:** Plating efficiency of the *B. subtilis* 168 strain and its RecA<sup>-</sup> derivative (HVS567) on LB  
 110 plates supplemented with different concentrations of HB-EMAU.

111 **C:** *Ori/ter* ratio at various HB-EMAU concentrations. Exponentially growing *B. subtilis* 168  
 112 cells were treated 90 min with different HB-EMAU concentrations. At OD<sub>600nm</sub> of about 0.2,  
 113 the total DNA was extracted and analyzed by qPCR to measure the *ori/ter* ratio. A  
 114 representative experiment is shown.

115



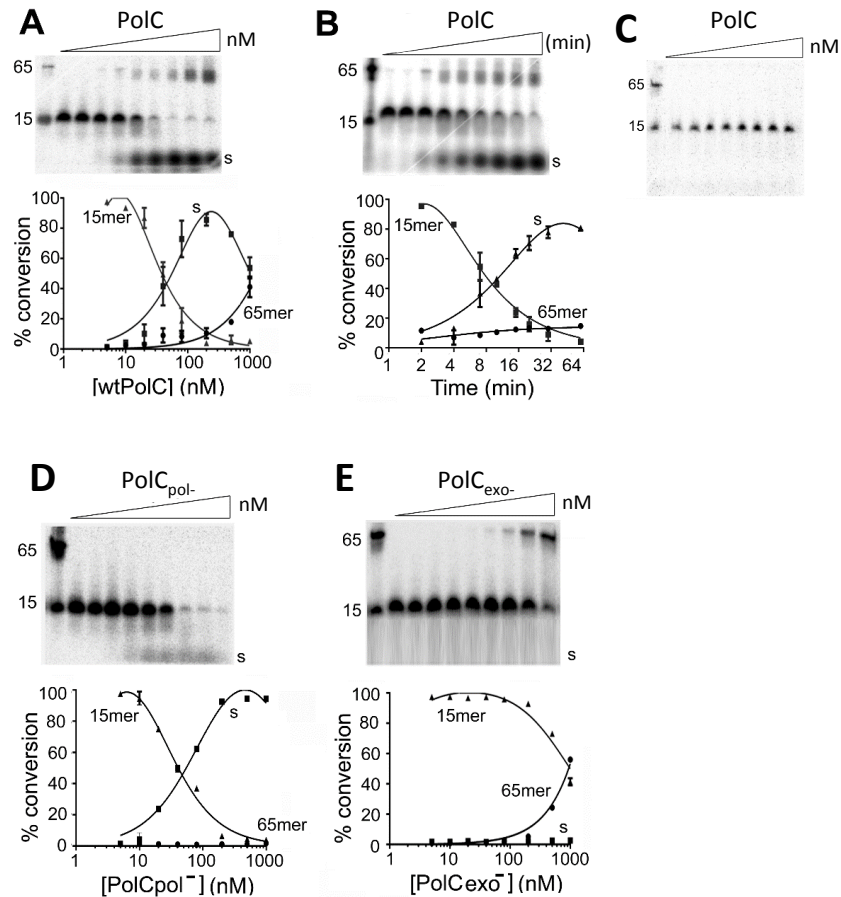

116

117 **Supplemental Figure S8**

118 *B. subtilis* PolC/PoIC<sub>pol-</sub>/PoIC<sub>exo-</sub> activity assays.

119 Primer extension assays using short radiolabelled 15mer annealed onto longer  
 120 oligonucleotide template (110 bases) for the detection of polymerase and exonuclease  
 121 activities. Polymerase products (65) and exonuclease products (s) are indicated. Protein  
 122 concentration titration assays (5, 10, 20, 40, 80, 200, 500 and 1000 nM) on DNA- (**A, D, E**)  
 123 or RNA-primed (**C**) templates. Time course assays (2, 4, 7, 10, 15, 20, 30 and 60 minutes)  
 124 with DNA-primed template and 80 nM PolC (**B**). The reaction samples were resolved by  
 125 electrophoresis through denaturing 15% (v/v) urea-polyacrylamide gels, the results were  
 126 analyzed using molecular imager and associated software (Bio-Rad) and the percentage of  
 127 the assay products was plotted using Graphpad – Prism 6. Bars represent mean values with  
 128 standard errors of at least three independent protein samples.

129

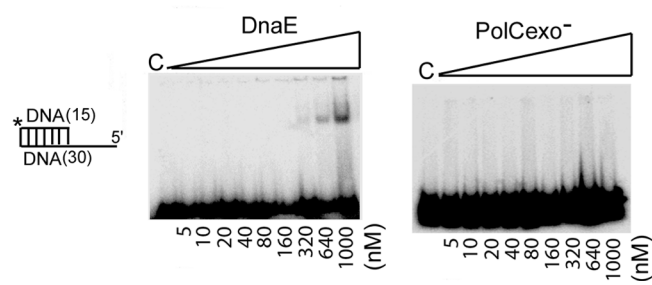

130

131

132

133 **Supplemental Figure S9**

134 Electrophoretic Mobility Shift Assays on DnaE and PolC<sub>exo-</sub>.

135 EMSAs showing the binding affinity of DnaE and PolC<sub>exo-</sub> to DNA primed (15 nt) templates  
 136 (30 nt). Protein concentration titration assays were carried out (5, 10, 20, 40, 80, 160, 320,  
 137 640 and 1000 nM) in the presence of 0.66 nM radiolabelled template (asterisk) and  
 138 incubated at 37°C for 5 minutes. Lanes labeled C, represent the control radiolabelled  
 139 substrate on its own. Reaction samples were resolved by native PAGE and the results were  
 140 analyzed using molecular imager and associated software (Bio-Rad).

141

142

**Table S1**

| Strain            | Context | Genotype                                          | Antibiotic resistance             | Main phenotypes                         | Reference or construction <sup>a</sup> | Source             |
|-------------------|---------|---------------------------------------------------|-----------------------------------|-----------------------------------------|----------------------------------------|--------------------|
| 168               | 168     | <i>trpC2</i>                                      | -                                 | -                                       | Laboratory collection                  | Philippe Noirot    |
| JIS9 <sup>b</sup> | 168     | <i>trpC-1</i>                                     | -                                 | -                                       | Laboratory collection                  | Jeff Errington     |
| PS1175            | 168     | <i>trpC2 spoIIAC1</i>                             | -                                 | Spo <sup>r</sup>                        | (1)                                    | Alexandro Galizzi  |
| PB1856            | 168     | <i>mutSL::cat trpC2 pheA1</i>                     | Cm <sup>R</sup>                   | MutSL <sup>r</sup>                      | (2)                                    | Neal C. Brown      |
| F25               | 168     | <i>polC25 polIA59 met his leu</i>                 | HB <sup>R</sup>                   | PoIC mutator                            | (3)                                    | Neal C. Brown      |
| F27               | 168     | <i>polC27 polIA59 met his leu</i>                 | HB <sup>R</sup>                   | PoIC mutator                            | (3)                                    | Neal C. Brown      |
| BD337             | 168     | <i>mut1 trpC2 thr-5</i>                           | -                                 | PoIC exo <sup>r</sup>                   | (4)                                    | Thomas A. Trautner |
| L1434             | 168     | <i>dnaD23 metC lys21</i>                          | -                                 | DnaD <sup>TS</sup>                      | (5)                                    | Dimitri Karamata   |
| L1439             | 168     | <i>dnaI2 metC ilvA1</i>                           | -                                 | DnaI <sup>TS</sup>                      | (5)                                    | Dimitri Karamata   |
| EDV97             | 168     | <i>polA::pmr trpC2</i>                            | Phl <sup>R</sup>                  | PoIA <sup>r</sup>                       | (6)                                    | Etienne Dervyn     |
| EDJ148            | 168     | <i>dnaE2.6-pmr trpC2</i>                          | Phl <sup>R</sup>                  | DnaE <sup>TS</sup>                      | (6)                                    | Etienne Dervyn     |
| HVS557            | 168     | <i>recA::tet trpC2</i>                            | Tet <sup>R</sup>                  | RecA <sup>r</sup>                       | (7)                                    | Etienne Dervyn     |
| HVS597            | 168     | <i>Pspac-dnaC-ery trpC2</i>                       | Em <sup>R</sup>                   | DnaC <sup>ind</sup>                     | (6)                                    | Etienne Dervyn     |
| HVS609            | 168     | <i>Pspac-polC-ery trpC2</i>                       | Em <sup>R</sup>                   | PoIC <sup>ind</sup>                     | (6)                                    | Etienne Dervyn     |
| HVS614            | 168     | <i>Pspac-dnaE-ery trpC2</i>                       | Em <sup>R</sup>                   | PoIC <sup>ind</sup>                     | (6)                                    | Etienne Dervyn     |
| HVS609p           | 168     | <i>Pspac-polC-ery trpC2 pMAP65</i>                | Em <sup>R</sup> Km <sup>R</sup>   | DnaE <sup>ind</sup>                     | (6)                                    | Etienne Dervyn     |
| HVS614p           | 168     | <i>Pspac-dnaE-ery trpC2 pMAP65</i>                | Em <sup>R</sup> Km <sup>R</sup>   | DnaE <sup>ind</sup>                     | (6)                                    | Etienne Dervyn     |
| DGRM1             | TF8A    | <i>dnaE2.2-pmr trpC2</i>                          | Phl <sup>R</sup>                  | DnaE <sup>TS</sup>                      | (8)                                    | Etienne Dervyn     |
| DGRM2             | TF8A    | <i>dnaE2.4-pmr trpC2</i>                          | Phl <sup>R</sup>                  | DnaE <sup>TS</sup>                      | (8)                                    | Etienne Dervyn     |
| DGRM3             | TF8A    | <i>dnaE2.6-pmr trpC2</i>                          | Phl <sup>R</sup>                  | DnaE <sup>TS</sup>                      | (8)                                    | Etienne Dervyn     |
| DGRM4             | TF8A    | <i>dnaE2.10-pmr trpC2</i>                         | Phl <sup>R</sup>                  | DnaE <sup>TS</sup>                      | (8)                                    | Etienne Dervyn     |
| DGRM630           | TF8A    | <i>dnaE2.1-prm trpC2</i>                          | Phl <sup>R</sup>                  | DnaE <sup>TS</sup>                      | (8)                                    | Etienne Dervyn     |
| DGRM631           | TF8A    | <i>dnaE2.3-prm trpC2</i>                          | Phl <sup>R</sup>                  | DnaE <sup>TS</sup>                      | (8)                                    | Etienne Dervyn     |
| DGRM632           | TF8A    | <i>dnaE2.5-prm trpC2</i>                          | Phl <sup>R</sup>                  | DnaE <sup>TS</sup>                      | (8)                                    | Etienne Dervyn     |
| DGRM633           | TF8A    | <i>dnaE2.7-prm trpC2</i>                          | Phl <sup>R</sup>                  | DnaE <sup>TS</sup>                      | (8)                                    | Etienne Dervyn     |
| DGRM634           | TF8A    | <i>dnaE2.8-prm trpC2</i>                          | Phl <sup>R</sup>                  | DnaE <sup>TS</sup>                      | (8)                                    | Etienne Dervyn     |
| DGRM635           | TF8A    | <i>dnaE2.11-prm trpC2</i>                         | Phl <sup>R</sup>                  | DnaE <sup>TS</sup>                      | (8)                                    | Etienne Dervyn     |
| DGRM799           | 168     | <i>polC-spc trpC2</i>                             | Spc <sup>R</sup>                  | PoIC exo <sup>r</sup>                   | PCR <i>polC-spc</i> → 168 (Spc)        | Etienne Dervyn     |
| DGRM801           | 168     | <i>mutIA-spc trpC2</i>                            | Spc <sup>R</sup>                  | DinG <sup>r</sup>                       | DGRM799 → 168 (Pmr)                    | Etienne Dervyn     |
| DGRM803           | 168     | <i>dinG::pmr trpC2</i>                            | Phl <sup>R</sup>                  | DinG <sup>r</sup>                       | PCR <i>ΔdinG</i> → 168 (Pmr)           | Etienne Dervyn     |
| DGRM804           | 168     | <i>kapD::spc trpC2</i>                            | Spc <sup>R</sup>                  | KapD <sup>r</sup>                       | PCR <i>ΔkapD</i> → 168 (Spc)           | Etienne Dervyn     |
| DGRM806           | 168     | <i>ypfB::spc trpC2</i>                            | Spc <sup>R</sup>                  | YprB <sup>r</sup>                       | PCR <i>ΔypfB</i> → 168 (Spc)           | Etienne Dervyn     |
| DGRM808           | 168     | <i>ppsA::spc trpC2</i>                            | Phl <sup>R</sup>                  | PpsA <sup>r</sup>                       | PCR <i>ΔppsA</i> → 168 (Spc)           | Etienne Dervyn     |
| DGRM810           | 168     | <i>yhaM::spc trpC2</i>                            | Spc <sup>R</sup>                  | YhaM <sup>r</sup>                       | PCR <i>ΔyhaM</i> → 168 (Spc)           | Etienne Dervyn     |
| DGRM812           | JIS9    | <i>mutSL::cat trpC-1</i>                          | Cm <sup>R</sup>                   | MutSL <sup>r</sup>                      | PB1856 → JIS9 (Cm)                     | Etienne Dervyn     |
| DGRM818           | 168     | <i>Pspac-polC-ery PolA::pmr trpC2</i>             | Em <sup>R</sup> Phl <sup>R</sup>  | PoIC <sup>ind</sup> PoIA <sup>r</sup>   | EDV97 → HVS609 (Pmr)                   | Etienne Dervyn     |
| DGRM821           | 168     | <i>dnaE2.6-pmr amyE::Pspank-dnaE-spc-trpC2</i>    | Phl <sup>R</sup> Spc <sup>R</sup> | DnaE <sup>TS</sup> DnaE <sup>ind</sup>  | pDR111- <i>dnaE</i> → EDJ148 (Spc)     | Etienne Dervyn     |
| DGRM824           | 168     | <i>dnaE2.6-pmr amyE::Pspank-dnaE2.1-spc trpC2</i> | Phl <sup>R</sup> Spc <sup>R</sup> | DnaE <sup>TS</sup> DnaE2 <sup>ind</sup> | pDR111- <i>dnaE2.1</i> → EDJ148 (Spc)  | Etienne Dervyn     |

143

144

|         |      |                                                    |                                                                   |                                            |                |                                      |
|---------|------|----------------------------------------------------|-------------------------------------------------------------------|--------------------------------------------|----------------|--------------------------------------|
| DGRM825 | 168  | <i>dnaE2.6-pmr amyE::Pspak-dnaED2-spc trpC2</i>    | Phl <sup>h</sup> Spc <sup>a</sup>                                 | DnaE <sup>h</sup> DnaED2 <sup>ind</sup>    | IPTG sensitive | pDR111- <i>dnaED2</i> → EDJ148 (Spc) |
| DGRM827 | 168  | <i>dnaE2.6-pmr amyE::Pspak-dnaED3-spc trpC2</i>    | Phl <sup>h</sup> Spc <sup>a</sup>                                 | DnaE <sup>h</sup> DnaED3 <sup>ind</sup>    | IPTG sensitive | pDR111- <i>dnaED3</i> → EDJ148 (Spc) |
| DGRM830 | 168  | <i>dnaE2.6-pmr amyE::Pspak-dnaED3-spc trpC2</i>    | Phl <sup>h</sup> Spc <sup>a</sup>                                 | DnaE <sup>h</sup> DnaED3 <sup>ind</sup>    | IPTG sensitive | pFL6 → DGRM821 (Ery)                 |
| DGRM831 | 168  | <i>dnaE2.6-pmr amyE::Pspak-dnaED1SPA-spc trpC2</i> | Phl <sup>h</sup> Spc <sup>a</sup>                                 | DnaE <sup>h</sup> DnaED1SPA <sup>ind</sup> | IPTG sensitive | pFL6 → DGRM824 (Ery)                 |
| DGRM832 | 168  | <i>dnaE2.6-pmr amyE::Pspak-dnaED2SPA-spc trpC2</i> | Phl <sup>h</sup> Spc <sup>a</sup>                                 | DnaE <sup>h</sup> DnaED2SPA <sup>ind</sup> | IPTG sensitive | pFL6 → DGRM825 (Ery)                 |
| DGRM833 | 168  | <i>dnaE2.6-pmr amyE::Pspak-dnaED3SPA-spc trpC2</i> | Phl <sup>h</sup> Spc <sup>a</sup>                                 | DnaE <sup>h</sup> DnaED3SPA <sup>ind</sup> | IPTG sensitive | pFL6 → DGRM827 (Ery)                 |
| DGRM836 | 168  | <i>dnaE-pmr trpC2</i>                              | Phl <sup>h</sup>                                                  |                                            |                | PCR <i>dnaE</i> → EDJ148 (47°C)      |
| DGRM837 | 168  | <i>dnaEM7-pmr trpC2</i>                            | Phl <sup>h</sup>                                                  | DnaEM7                                     |                | PCR <i>dnaEM7</i> → EDJ148 (47°C)    |
| DGRM838 | JJ59 | <i>Pspac-dnaEM7-ery trpC-1</i>                     | Em <sup>k</sup>                                                   | DnaEM7 <sup>ind</sup>                      |                | HV5614 → DGRM850 (Ery) <sup>c</sup>  |
| DGRM840 | 168  | <i>Pspac-polC-ery dnaE-pmr trpC2</i>               | Em <sup>k</sup> Phl <sup>h</sup>                                  | PolC <sup>ind</sup>                        |                | DGRM836 → HV5609 (Pmr)               |
| DGRM841 | 168  | <i>Pspac-polC-ery dnaEM7-pmr trpC2</i>             | Em <sup>k</sup> Phl <sup>h</sup>                                  | PolC <sup>ind</sup> DnaEM7                 |                | DGRM837 → HV5609 (Pmr)               |
| DGRM847 | 168  | <i>Pspac-PolC-pmr</i>                              | Phl <sup>h</sup>                                                  | PolC <sup>ind</sup>                        | IPTG dependent | pMutin-Pmr → HV5609 (Pmr)            |
| DGRM848 | JJ59 | <i>Pspac-dnaEM7-ery Pspac-PolC-pmr trpC-1</i>      | Em <sup>k</sup> Phl <sup>h</sup>                                  | PolC <sup>ind</sup> DnaEM7 <sup>ind</sup>  | IPTG dependent | DGRM847 → DGRM838 (Pmr)              |
| DGRM850 | JJ59 | <i>dnaEM7-pmr trpC-1</i>                           | Phl <sup>h</sup>                                                  | DnaEM7                                     |                | DGRM837 → JJ59 (Pmr) <sup>c</sup>    |
| DGRM852 | JJ59 | <i>dnaE25-pmr trpC-1</i>                           | Phl <sup>h</sup>                                                  | DnaE25                                     |                | PCR <i>dnaE25-pmr</i> → JJ59 (Pmr)   |
| DGRM853 | 168  | <i>polA59 polC25-spc met his leu</i>               | Spc <sup>a</sup>                                                  | PolC25                                     |                | DGRM799 → F25 (Spc) <sup>c</sup>     |
| DGRM855 | JJ59 | <i>polC25-spc trpC-1</i>                           | Spc <sup>a</sup> HB <sup>k</sup>                                  | PolC25                                     |                | DGRM853 → JJ59 (HB) <sup>c</sup>     |
| DGRM857 | JJ59 | <i>polC27 trpC-1</i>                               | HB <sup>k</sup>                                                   | PolC27                                     |                | F27 → JJ59 (HB) <sup>c</sup>         |
| DGRM860 | JJ59 | <i>dnaEM7-pmr polC25-spc trpC-1</i>                | Phl <sup>h</sup> Spc <sup>a</sup> HB <sup>k</sup>                 | DnaEM7 PolC25                              |                | DGRM855 → DGRM850 (Spc)              |
| DGRM861 | JJ59 | <i>dnaEM7-pmr polC27 trpC-1</i>                    | Phl <sup>h</sup> HB <sup>k</sup>                                  | DnaEM7 PolC27                              |                | DGRM857 → DGRM850 (HB)               |
| DGRM871 | JJ59 | <i>dnaEM7-pmr mutSL::cat trpC-1</i>                | Phl <sup>h</sup> Cm <sup>k</sup>                                  | DnaEM7 MutSL                               |                | PB1856 → DGRM850 (Cm)                |
| DGRM872 | JJ59 | <i>dnaE25-pmr mutSL::cat trpC-1</i>                | Phl <sup>h</sup> Cm <sup>k</sup>                                  | DnaE25 MutSL                               |                | PB1856 → DGRM852 (Cm)                |
| DGRM873 | JJ59 | <i>polC25-spc mutSL::cat trpC-1</i>                | Spc <sup>a</sup> Cm <sup>k</sup> HB <sup>k</sup>                  | PolC25 MutSL                               |                | PB1856 → DGRM855 (Cm)                |
| DGRM874 | JJ59 | <i>polC27 mutSL::cat trpC-1</i>                    | HB <sup>k</sup> Cm <sup>k</sup>                                   | PolC27 MutSL                               |                | PB1856 → DGRM857 (Cm)                |
| DGRM875 | JJ59 | <i>dnaEM7-pmr polC25-spc mutSL::cat trpC-1</i>     | Phl <sup>h</sup> Spc <sup>a</sup> HB <sup>k</sup> Cm <sup>k</sup> | DnaEM7 PolC25 MutSL                        |                | PB1856 → DGRM860 (Cm)                |
| DGRM876 | JJ59 | <i>dnaEM7-pmr polC27 mutSL::cat trpC-1</i>         | Phl <sup>h</sup> HB <sup>k</sup> Cm <sup>k</sup>                  | DnaEM7 PolC27 MutSL                        |                | PB1856 → DGRM861 (Cm)                |

| Plasmides             | main characteristics                                                                                                                 | antibiotic resistance | Reference or construction <sup>a</sup> | Source             |
|-----------------------|--------------------------------------------------------------------------------------------------------------------------------------|-----------------------|----------------------------------------|--------------------|
| pDR111                | Integration vector used to place genes under the control of the IPTG inducible promoter <i>Phyger-spank</i> at the <i>amyE</i> locus | Spc <sup>a</sup>      | (9)                                    | Richard Losick     |
| pMUP65                | Integration vector used to place genes under the control of the IPTG inducible promoter <i>Pspac</i>                                 | Phl <sup>h</sup>      | Laboratory collection                  | Marie-Agnès Pettit |
| pFL6                  | Used to over-produce Lact <sup>h</sup>                                                                                               | Km <sup>k</sup>       | (10)                                   | François Leconte   |
| PDR111- <i>dnaE</i>   | pMUTIN derivative designed to insert the SPA tag at the C terminus of <i>dnaE</i>                                                    | Em <sup>k</sup>       | (11)                                   |                    |
| PDR111- <i>dnaED1</i> | pDR111 derivative encoding <i>dnaE</i> from <i>Phyger-spank</i>                                                                      | Spc <sup>a</sup>      | PCR <i>dnaE</i> → pDR111               |                    |
| PDR111- <i>dnaED2</i> | pDR111 derivative encoding <i>dnaED1</i> from <i>Phyger-spank</i>                                                                    | Spc <sup>a</sup>      | PCR <i>dnaED1</i> → pDR112             |                    |
| PDR111- <i>dnaED3</i> | pDR111 derivative encoding <i>dnaED2</i> from <i>Phyger-spank</i>                                                                    | Spc <sup>a</sup>      | PCR <i>dnaED2</i> → pDR113             |                    |
|                       |                                                                                                                                      | Spc <sup>a</sup>      | PCR <i>dnaED3</i> → pDR114             |                    |

<sup>a</sup> X → Y indicates that strain Y was transformed with DNA from source X, with the selection noted in parentheses; Spc: spectinomycin; Ery: erythromycin; Cat: chloramphenicol ; Pmr: phleomycin; Kan: kanamycin; HB: HB-EMAU.

<sup>b</sup> This strain is a derivative of 168 in which (i) the *trpC2* locus was replaced by a WT allele and (ii) an A was deleted from a run of 6As in the *trpC* gene.

<sup>c</sup> The transfer of the *polC25* and *polC27-spc* mutations in the various strains was selected on HB-EMAU or Spc LB plates. The transfer of the *dnaEM7-pmr*, *dnaE25-pmr* or *Pspac-dnaE-erm* mutations was carried out using selection on phleomycin or erythromycin. The presence of the polymerase mutation was confirmed by mutagenesis assays and/or DNA sequencing.

147  
148  
149  
150  
151  
152  
153  
154  
155  
156  
157  
158  
159  
160  
161  
162  
163  
164  
165  
166  
167  
168  
169  
170  
171  
172  
173  
174  
175  
176  
177  
178  
179  
180  
181  
182  
183  
184  
185  
186  
187  
188  
189  
190  
191  
192

## References

1. Magill, NG, Setlow, P. 1992 Properties of purified sporlets produced by spore mutants of *Bacillus subtilis*. *J. Bact.* **174**, 8148–8151. (doi:10.1128/jb.174.24.8148-8151.1992)
2. Ginetti, F, Perego, M, Albertini, AM, Galizzi, A. 1996 *Bacillus subtilis mutS mutL* operon: identification, nucleotide sequence and mutagenesis. *Microbiology* **142**, 2021–2029. (doi:10.1099/13500872-142-8-2021)
3. Gass, KB, Cozzarelli, NR 1973 Further genetic and enzymological characterization of three *Bacillus subtilis* deoxyribonucleic acid polymerases. *J. Biol. Chem.* **248**, 7688–7700. (<http://www.jbc.org/content/248/22/7688.short#ref-list-1>)
4. Gross, JD, Karamata, D, Hempstead PG. 1968 Temperature-sensitive mutants of *Bacillus subtilis* affected in DNA synthesis. *Cold Spring Harbor Symp Quant Biol.* **33**, 307. (doi:10.1101/SQB.1968.033.01.034)
5. Karamata, D. & Gross, J. D. 1970 Isolation and genetic analysis of temperature-sensitive mutants of *B. subtilis* defective in DNA synthesis. *Mol Gen Genet* **108**, 277–287. (doi: 10.1007/BF00283358)
6. Dervyn, E., Suski, C., Daniel, R., Bruand, C., Chapuis, J., Errington, J., Janni re, L. & Ehrlich, S. D. 2001 Two essential DNA polymerases at the bacterial replication fork. *Science* **294**, 1716–1719. (doi:<http://doi.org/10.1126/science.1066351>)
7. Ch edin, F., Dervyn, E., Dervyn R., Ehrlich S.D., and Noirot, P. 1994 Frequency of deletion formation decreases exponentially with distance between short direct repeats. *Mol. Microbiol.* **12**, 561-569. (<https://www.ncbi.nlm.nih.gov/pubmed/7934879>)
8. Janni re, L. et al. 2007 Genetic evidence for a link between glycolysis and DNA replication. *PLoS ONE* **2**, e447. (doi:10.1371/journal.pone.0000447)
9. van Ooij, C. & Losick, R. 2003 Subcellular localization of a small sporulation protein in *Bacillus subtilis*. *J. Bact.* **185**, 1391–1398. (doi:10.1128/JB.185.4.1391-1398.2003)
10. Petit, M.-A., Dervyn, E., Rose, M., Entian, K.-D., McGovern, S., Ehrlich, S. D. & Bruand, C. 1998 PcrA is an essential DNA helicase of *Bacillus subtilis* fulfilling functions both in repair and rolling-circle replication. *Mol. Microbiol.* **29**, 261–273. (doi: 10.1046/j.1365-2958.1998.00001.x)
11. Costes, A., Lecointe, F., McGovern, S., Quevillon-Cheruel, S. & Polard, P. 2010 The C-Terminal Domain of the Bacterial SSB Protein Acts as a DNA Maintenance Hub at Active Chromosome Replication Forks. *PLoS Genet.* **6**, e1001238. (doi:10.1371/journal.pgen.1001238)
